# Supplementary material for: Diclofenac Removal by Alkylammonium Clay Minerals Prepared over Microwave Heating
Source: PubMed Central journal article supplement (PMC11635518; doi:10.1021/acsomega.4c05763), 2024-11-23
Supplement: ao4c05763_si_001.pdf [file ao4c05763_si_001.pdf]

## SUPPORTING INFORMATION FOR

### **Diclofenac removal by alkylammonium clay minerals prepared over microwave heating**

Denise B. França<sup>a,1</sup>, Alice P. N. Silva<sup>a</sup>, Josy A. Osajima<sup>b</sup>, Edson C. Silva-Filho<sup>b</sup>,  
Santiago Medina-Carrasco<sup>c</sup>, Maria del Mar Orta<sup>d</sup>, Maguy Jaber<sup>e</sup>, Maria G. Fonseca<sup>a\*</sup>

*<sup>a</sup>Universidade Federal da Paraíba, Núcleo de Pesquisa e Extensão - Laboratório de Combustíveis e Materiais (NPE - LACOM), Cidade Universitária s/n – Campus I, 58051-900, João Pessoa-PB, Brazil.*

*<sup>b</sup>Universidade Federal do Piauí, Laboratório Interdisciplinar de Materiais Avançados (LIMAV), Avenida Universitária s/n, 64049-550, Teresina-PI, Brazil.*

*<sup>c</sup>Universidad de Sevilla, SGI Laboratorio de Rayos X - Centro de Investigación, Tecnología e Innovación de la Universidad de Sevilla (CITIUS), Avenida Reina Mercedes, 4B, 41012, Sevilla, Spain.*

*<sup>d</sup>Universidad de Sevilla, Departamento de Química Analítica da Facultad de Farmacia, Calle Profesor García González 2, 41012, Sevilla, Spain*

*<sup>e</sup>Sorbonne Université, CNRS UMR 8220, Laboratoire d'Archéologie Moléculaire et Structurale (LAMS), Case courrier 225, 4 pl. Jussieu, 75252, Paris Cedex 05, France.*

\*mgardennia@quimica.ufpb.br

---

<sup>1</sup> *Universidade Federal do Piauí, Laboratório Interdisciplinar de Materiais Avançados (LIMAV), Avenida Universitária s/n, 64049-550, Teresina-PI, Brazil.*

**Table S1. Basal distance values obtained from TEM images**

| Sample                    | Basal spacing (nm)           |
|---------------------------|------------------------------|
| C <sub>14</sub> -Ver-100% | 1.1-1.2, 2.6-2.7             |
| C <sub>14</sub> -Ver-200% | 1.1-1.2, 2.6-2.7             |
| C <sub>16</sub> -Ver-100% | 1.1, 2.7-2.8 and 3.9-4.1     |
| C <sub>16</sub> -Ver-200% | 1.0-1.1, 2.9                 |
| C <sub>18</sub> -Ver-100% | 1.0-1.2, 2.8-2.9 and 4.2-4.4 |
| C <sub>18</sub> -Ver-200% | 1.0-1.10, 3.3-3.4            |

**Table S2. Adsorption parameters of drug adsorption on organo-vermiculites according to the Langmuir, Freundlich, and Temkin models**

| Langmuir                  |                       |                                                            |                                        |                       |                       |
|---------------------------|-----------------------|------------------------------------------------------------|----------------------------------------|-----------------------|-----------------------|
| Sample                    | $q_e$ ( <i>exp</i> )  | $q_{max}$                                                  | $K_L$                                  | $R^2$                 | SD                    |
|                           | (mg g <sup>-1</sup> ) | (mg g <sup>-1</sup> )                                      | (10 <sup>-2</sup> L mg <sup>-1</sup> ) |                       | (mg g <sup>-1</sup> ) |
| C <sub>14</sub> -Ver-100% | 36.30 ± 1.08          | 46.70 ± 2.51                                               | 1.16 ± 0.16                            | 0.9862                | 1.62                  |
| C <sub>16</sub> -Ver-100% | 52.89 ± 1.05          | 97.4 ± 7.39                                                | 0.30 ± 0.04                            | 0.9913                | 1.84                  |
| C <sub>18</sub> -Ver-100% | 17.90 ± 0.72          | 21.64 ± 1.00                                               | 0.89 ± 0.12                            | 0.9876                | 0.68                  |
| C <sub>14</sub> -Ver-200% | 97.75 ± 1.46          | 115.10 ± 4.80                                              | 1.1 ± 0.13                             | 0.9878                | 3.63                  |
| C <sub>16</sub> -Ver-200% | 110.06 ± 1.65         | 118.19 ± 4.50                                              | 2.39 ± 0.35                            | 0.9836                | 4.98                  |
| C <sub>18</sub> -Ver-200% | 107.97 ± 2.16         | 115.86 ± 4.50                                              | 3.23 ± 0.58                            | 0.9805                | 5.58                  |
| Freundlich                |                       |                                                            |                                        |                       |                       |
| Sample                    | $n$                   | $K_F$                                                      | $R^2$                                  | SD                    |                       |
|                           |                       | (mg g <sup>-1</sup> )(mg L <sup>-1</sup> ) <sup>-1/n</sup> |                                        | (mg g <sup>-1</sup> ) |                       |
| C <sub>14</sub> -Ver-100% | 2.30 ± 0.29           | 3.06 ± 0.86                                                | 0.9383                                 | 3.43                  |                       |
| C <sub>16</sub> -Ver-100% | 1.61 ± 0.13           | 1.28 ± 0.36                                                | 0.9744                                 | 3.15                  |                       |
| C <sub>18</sub> -Ver-100% | 2.36 ± 0.17           | 1.36 ± 0.24                                                | 0.9805                                 | 0.86                  |                       |
| C <sub>14</sub> -Ver-200% | 2.55 ± 0.21           | 9.21 ± 1.61                                                | 0.9750                                 | 5.21                  |                       |
| C <sub>16</sub> -Ver-200% | 3.39 ± 0.30           | 19.42 ± 2.72                                               | 0.9750                                 | 6.15                  |                       |

|                           |             |              |        |      |
|---------------------------|-------------|--------------|--------|------|
| C <sub>18</sub> -Ver-200% | 3.85 ± 0.47 | 24.33 ± 4.04 | 0.9576 | 8.22 |
|---------------------------|-------------|--------------|--------|------|

---

Temkin

---

| Sample                    | $b_T$<br>(10 <sup>2</sup> J mol <sup>-1</sup> ) | $A_T$<br>(L mg <sup>-1</sup> ) | R <sup>2</sup> | SD<br>(mg g <sup>-1</sup> ) |
|---------------------------|-------------------------------------------------|--------------------------------|----------------|-----------------------------|
| C <sub>14</sub> -Ver-100% | 1.34 ± 0.17                                     | 0.54 ± 0.24                    | 0.8778         | 4.84                        |
| C <sub>16</sub> -Ver-100% | 1.02 ± 0.21                                     | 0.38 ± 0.29                    | 0.7108         | 10.58                       |
| C <sub>18</sub> -Ver-100% | 2.91 ± 0.35                                     | 0.54 ± 0.27                    | 0.8813         | 2.13                        |
| C <sub>14</sub> -Ver-200% | 238 ± 46.1                                      | 4.51 ± 5.16                    | 0.7423         | 16.73                       |
| C <sub>16</sub> -Ver-200% | 0.84 ± 0.14                                     | 33.60 ± 40.8                   | 0.8032         | 17.26                       |
| C <sub>18</sub> -Ver-200% | 0.68 ± 0.06                                     | 11.80 ± 6.47                   | 0.9397         | 9.80                        |

---

**Table S3. Diclofenac adsorption capacity obtained for others organoclays according to the literature**

| Sample                                                 | Surfactant/proportion<br>(% CEC) | Experimental<br>conditions                                                                                                                   | $q_e^c$<br>(mg g <sup>-1</sup> ) | Reference                    |
|--------------------------------------------------------|----------------------------------|----------------------------------------------------------------------------------------------------------------------------------------------|----------------------------------|------------------------------|
| Mt <sup>a</sup><br>(76 cmol(+)<br>kg <sup>-1</sup> )   | C <sub>16</sub> Br/400%          | pH: 6.5<br><br>C <sub>i</sub> : 10 - 2000 mg L <sup>-1</sup><br><br>Organoclay mass: 100<br>mg                                               | 49.31                            | Oliveira et al. <sup>1</sup> |
|                                                        | BDTA <sup>c</sup> /400%          | Volume of drug<br>solution: 50 mL<br><br>t: 24 h<br><br>T: 25 °C                                                                             | 60.40                            |                              |
| Bent <sup>b</sup><br>(75 cmol(+)<br>kg <sup>-1</sup> ) | DDP <sup>d</sup> /200%           | pH: 6.0<br><br>C <sub>i</sub> : 1-500 mg L <sup>-1</sup><br><br>Organoclay mass: 150<br>mg<br><br>V = 20 mL<br><br>t: 10 min<br><br>T : 25°C | 25.5                             | França et al. <sup>2</sup>   |
|                                                        | HDP <sup>e</sup> /200%           | pH: 6.0<br><br>C <sub>i</sub> : 1-500 mg L <sup>-1</sup><br><br>Organoclay mass: 50<br>mg<br><br>V = 20 mL                                   | 91.13                            |                              |

t: 10 min

T : 25°C

---

|                                       |                         |                                                                                                                                                    |        |                                           |
|---------------------------------------|-------------------------|----------------------------------------------------------------------------------------------------------------------------------------------------|--------|-------------------------------------------|
| Mt                                    | HDBA <sup>f</sup> /160% | C <sub>i</sub> : 20-150 mg L <sup>-1</sup>                                                                                                         | 125.55 | Chu et al. <sup>3</sup>                   |
| (90 cmol(+)<br>kg <sup>-1</sup> )     |                         | Organoclay mass: 50<br>mg<br>V = 50 mL<br>T : 25 °C                                                                                                |        |                                           |
| Na-Mt                                 | C <sub>16</sub> Br/200% | pH > 5.0<br>C <sub>i</sub> ≈ 50 - 1500 mg L <sup>-1</sup><br>Organoclay mass = 70<br>mg<br>V <sub>sol</sub> (DFNa) = 20 mL<br>t = 24 h             | 318.13 | Sun et al. <sup>4</sup>                   |
| (120.0 cmol<br>kg <sup>-1</sup> )     |                         |                                                                                                                                                    |        |                                           |
| Bent                                  | C <sub>16</sub> Br/260% | pH: 7.0<br>C <sub>i</sub> ≈ 159 - 1590 mg L <sup>-1</sup><br>Organoclay mass not<br>given<br>V = 40 mL<br>t = 7 days<br>T : 25 °C                  | 388.0  | Martinez-<br>Costa et<br>al. <sup>5</sup> |
| (139<br>cmol(+)<br>kg <sup>-1</sup> ) |                         |                                                                                                                                                    |        |                                           |
| Na-Ver                                | C <sub>14</sub> Br/200% | pH 6.0 for C <sub>16</sub> -Ver-                                                                                                                   | 97.75  | Present                                   |
| (67 cmol(+)<br>kg <sup>-1</sup> )     | C <sub>16</sub> Br/200% | 200% and C <sub>18</sub> -Ver-                                                                                                                     | 110.06 | study                                     |
|                                       | C <sub>18</sub> Br/200% | 200%; pH 8.0 for C <sub>14</sub> -<br>Ver-200%<br>C <sub>i</sub> : 1-500 mg L <sup>-1</sup><br>Organoclay mass: 50<br>mg<br>V = 20 mL<br>t: 30 min | 107.97 |                                           |

---

---

T : 25°C

---

<sup>a</sup>Montmorillonite; <sup>b</sup>Bentonite; <sup>c</sup>Benzyltrimethyltetradecylammonium;

<sup>d</sup>Dodecylpyridinium; <sup>e</sup>Hexadecylpyridinium; <sup>f</sup>Benzyltrimethylhexadecylammonium

**Table S4. Summary of mass losses and temperature intervals for events in the DTG curves for organovermiculites after stability test**

| pH  | Sample                    | Event | T (°C)  | Mass loss (%) | Total mass loss (%) | Total organic content <sup>a</sup> (%) |
|-----|---------------------------|-------|---------|---------------|---------------------|----------------------------------------|
| 6.0 | C <sub>14</sub> -Ver-100% | I     | 50-115  | 2.6           | 19.2                | 12.8                                   |
|     |                           | II    | 115-228 | 3.5           |                     |                                        |
|     |                           | III   | 228-341 | 7.5           |                     |                                        |
|     |                           | IV    | 341-443 | 1.2           |                     |                                        |
|     |                           | V     | 443-523 | 0.6           |                     |                                        |
|     |                           | VI    | 523-762 | 3.8           |                     |                                        |
|     | C <sub>14</sub> -Ver-200% | I     | 50-118  | 2.7           | 26.2                | 20.8                                   |
|     |                           | II    | 118-184 | 2.8           |                     |                                        |
|     |                           | III   | 184-216 | 11.3          |                     |                                        |
|     |                           | IV    | 216-345 | 3.0           |                     |                                        |
|     |                           | V     | 345-518 | 3.7           |                     |                                        |
|     |                           | VI    | 518-770 | 2.7           |                     |                                        |
|     | C <sub>16</sub> -Ver-100% | II    | 50-125  | 2.2           | 18.2                | 13.3                                   |
|     |                           | III   | 125-221 | 3.1           |                     |                                        |
|     |                           | IV    | 221-350 | 9.0           |                     |                                        |
|     |                           | V     | 350-462 | 1.3           |                     |                                        |
|     |                           | VI    | 522-774 | 2.6           |                     |                                        |
|     | C <sub>16</sub> -Ver-200% | I     | 50-118  | 2.7           | 29.9                | 22.8                                   |
|     |                           | II    | 118-221 | 7.1           |                     |                                        |
|     |                           | III   | 221-362 | 13.7          |                     |                                        |



|     |                           |     |         |      |      |      |
|-----|---------------------------|-----|---------|------|------|------|
|     |                           | IV  | 362-506 | 2.0  |      |      |
|     |                           | V   | 506-767 | 4.4  |      |      |
|     | C <sub>18</sub> -Ver-100% | II  | 50-133  | 2.5  | 20.2 | 14.9 |
|     |                           | III | 133-232 | 3.9  |      |      |
|     |                           | IV  | 232-345 | 9.4  |      |      |
|     |                           | V   | 345-459 | 1.4  |      |      |
|     |                           | VI  | 459-528 | 0.2  |      |      |
|     |                           | VII | 528-776 | 2.7  |      |      |
|     | C <sub>18</sub> -Ver-200% | I   | 50-130  | 2.3  | 33.9 | 27.4 |
|     |                           | II  | 130-266 | 15.9 |      |      |
|     |                           | III | 266-380 | 9.9  |      |      |
|     |                           | IV  | 380-497 | 1.6  |      |      |
|     |                           | V   | 497-774 | 4.2  |      |      |
| 8.0 | C <sub>14</sub> -Ver-100% | I   | 50-122  | 2.7  | 19.4 | 12.7 |
|     |                           | II  | 122-221 | 2.9  |      |      |
|     |                           | III | 221-340 | 7.9  |      |      |
|     |                           | IV  | 340-449 | 1.3  |      |      |
|     |                           | V   | 449-518 | 0.5  |      |      |
|     |                           | VI  | 518-775 | 4.1  |      |      |
|     | C <sub>14</sub> -Ver-200% | I   | 50-117  | 2.4  | 24.9 | 19.0 |
|     |                           | II  | 117-187 | 2.9  |      |      |
|     |                           | III | 187-217 | 2.0  |      |      |
|     |                           | IV  | 217-342 | 11.2 |      |      |
|     |                           | V   | 342-420 | 1.9  |      |      |
|     |                           | VI  | 420-513 | 1.0  |      |      |

|                           |     |         |      |      |      |
|---------------------------|-----|---------|------|------|------|
|                           | VII | 513-773 | 3.5  |      |      |
| C <sub>16</sub> -Ver-100% | I   | 50-121  | 2.5  | 20.3 | 14.1 |
|                           | II  | 121-222 | 3.3  |      |      |
|                           | III | 222-348 | 8.9  |      |      |
|                           | IV  | 348-446 | 1.3  |      |      |
|                           | V   | 446-519 | 0.6  |      |      |
|                           | VI  | 519-766 | 3.6  |      |      |
| C <sub>16</sub> -Ver-200% | I   | 50-120  | 2.1  | 29.4 | 23.1 |
|                           | II  | 120-220 | 7.7  |      |      |
|                           | III | 220-366 | 13.6 |      |      |
|                           | IV  | 366-506 | 1.9  |      |      |
|                           | V   | 506-770 | 4.2  |      |      |
| C <sub>18</sub> -Ver-100% | I   | 50-120  | 2.3  | 21.5 | 15.7 |
|                           | II  | 120-223 | 4.1  |      |      |
|                           | III | 223-362 | 10.0 |      |      |
|                           | IV  | 362-447 | 1.1  |      |      |
|                           | V   | 447-523 | 0.5  |      |      |
|                           | VI  | 523-769 | 3.5  |      |      |
| C <sub>18</sub> -Ver-200% | I   | 50-118  | 2.0  | 33.9 | 28.1 |
|                           | II  | 118-261 | 16.1 |      |      |
|                           | III | 261-366 | 10.1 |      |      |
|                           | IV  | 366-455 | 1.5  |      |      |
|                           | V   | 455-509 | 0.5  |      |      |
|                           | VI  | 509-766 | 3.8  |      |      |

<sup>a</sup>Values obtained from the sum of mass losses, excluding dehydration and dihydroxylation.

**Table S5. Results of the CHN elemental analysis of organovermiculites before and after treatment at pH 6.0 and pH 8.0**

| Sample                    | Untreated samples |     |     |            | pH 6.0 |     |     |            | pH 8.0 |     |     |            |
|---------------------------|-------------------|-----|-----|------------|--------|-----|-----|------------|--------|-----|-----|------------|
|                           | C                 | H   | N   | $\alpha^a$ | C      | H   | N   | $\alpha^a$ | C      | H   | N   | $\alpha^a$ |
|                           | (%)               | (%) | (%) | (%)        | (%)    | (%) | (%) | (%)        | (%)    | (%) | (%) | (%)        |
| C <sub>14</sub> -Ver-100% | 11.6              | 3.2 | 0.9 | 15.7       | 11.5   | 3.4 | 0.8 | 15.8       | 11.5   | 3.3 | 0.8 | 15.6       |
| C <sub>16</sub> -Ver-100% | 13.0              | 3.3 | 0.9 | 17.2       | 12.6   | 3.4 | 0.7 | 16.8       | 12.6   | 3.4 | 0.7 | 16.7       |
| C <sub>18</sub> -Ver-100% | 14.1              | 3.6 | 0.8 | 18.5       | 13.9   | 3.6 | 0.8 | 18.3       | 13.9   | 3.6 | 0.7 | 18.2       |
| C <sub>14</sub> -Ver-200% | 18.2              | 4.3 | 1.4 | 23.9       | 16.5   | 4.1 | 1.1 | 21.7       | 16.7   | 4.1 | 1.1 | 21.8       |
| C <sub>16</sub> -Ver-200% | 21.3              | 4.8 | 1.4 | 27.5       | 20.1   | 4.7 | 1.2 | 26.0       | 20.0   | 4.4 | 1.2 | 25.7       |
| C <sub>18</sub> -Ver-200% | 23.8              | 5.2 | 1.4 | 30.3       | 23.2   | 5.1 | 1.2 | 29.6       | 23.3   | 5.2 | 1.2 | 29.7       |

<sup>a</sup>Total organic content determined from CHN elemental analysis

**Table S6. Assignments of the bands in FTIR spectra associated with diclofenac adsorbed in the samples**

| Wavenumber<br>(cm <sup>-1</sup> ) | Assignment <sup>a</sup>             | Wavenumber<br>(cm <sup>-1</sup> ) | Assignment <sup>a</sup>                                           |
|-----------------------------------|-------------------------------------|-----------------------------------|-------------------------------------------------------------------|
| 1606                              | v(ring)                             | 1376~1380                         | v <sub>s</sub> (COO <sup>-</sup> )                                |
| 1577                              | v <sub>as</sub> (COO <sup>-</sup> ) | 1305                              | v <sub>as</sub> (C-N-C) + CH<br>rock + CH <sub>2</sub><br>wagging |
| 1557                              | v(ring)                             | 1287                              | CH rock + CH <sub>2</sub><br>wagging                              |
| 1506 and 1417                     | δ(C-N-H) + CH rock<br>(ring)        | 762                               | v(C-Cl) + δ(ring) in-<br>plane                                    |
| 1468 and 1453                     | v(C-N) + CH rock<br>(ring)          | 744                               | CH wagging (ring)                                                 |

<sup>a</sup>Iliescu et al.<sup>6</sup> and Lin-Vien et al.<sup>7</sup>

**Table S7. Experimental conditions for evaluation of the adsorption of sodium diclofenac by organophilic vermiculites**

| Parameter evaluated | Experimental conditions |                              |                                 |                                                   |
|---------------------|-------------------------|------------------------------|---------------------------------|---------------------------------------------------|
|                     | pH                      | m (mg)                       | t (min)                         | $C_i$ (mg L <sup>-1</sup> )                       |
| pH                  | 6.0; 8.0 and 10.0       | 25                           | 1440                            | 10                                                |
| Adsorbent dosage    | Fixed <sup>a</sup>      | 25, 50, 75, 100, 125 and 150 | 1440                            | 10                                                |
| Time                | Fixed <sup>a</sup>      | Fixed <sup>a</sup>           | 5, 7, 10, 15, 20, 30, 40 and 60 | 10                                                |
| Drug concentrations | Fixed <sup>a</sup>      | Fixed <sup>a</sup>           | Fixed <sup>a</sup>              | 1, 10, 50, 100, 150, 200, 250, 300, 400, and 500. |

<sup>a</sup>Optimal experimental conditions evaluated for each adsorbent.

**Table S8. Equilibrium adsorption models**

| Model                   | Equation <sup>a</sup>                               |
|-------------------------|-----------------------------------------------------|
| Langmuir <sup>8</sup>   | $q_e = \frac{q_{max}K_L C_e}{1 + K_L C_e}$ Eq. (S1) |
| Freundlich <sup>9</sup> | $q_e = K_F C_e^{\frac{1}{n}}$ Eq. (S2)              |
| Temkin <sup>10</sup>    | $q_e = \frac{RT}{b_T} \ln(A_T C_e)$ Eq. (S3)        |

<sup>a</sup> $C_e$  (mg L<sup>-1</sup>) is the drug equilibrium concentration;  $q_e$  (mg g<sup>-1</sup>) is the equilibrium amount of diclofenac adsorbed on the organoclays;  $q_{max}$  (mg g<sup>-1</sup>) is the maximum adsorption capacity of the adsorbent, assuming the uptake of the monolayer drug by the adsorbent;  $K_L$  (L mg<sup>-1</sup>) is the Langmuir constant;  $K_F$  (mg g<sup>-1</sup>) (mg L<sup>-1</sup>)<sup>-1/n</sup> and  $n$  are Freundlich constants related to the capacity and intensity of adsorption, respectively;  $b_T$  is the constant related to the adsorption heat (J mol<sup>-1</sup>);  $A_T$  is the isotherm constant (L mg<sup>-1</sup>);  $R$  is the gas constant (8.314 J mol<sup>-1</sup> K);  $T$  is the absolute temperature (K).

**Figure S1.** Interlayer arrangements of (a) C<sub>14</sub>, (b) C<sub>16</sub>, and (c) C<sub>18</sub> organic chains in the organophilic samples for (i) vermiculite and (ii) hydrobiotite phases.

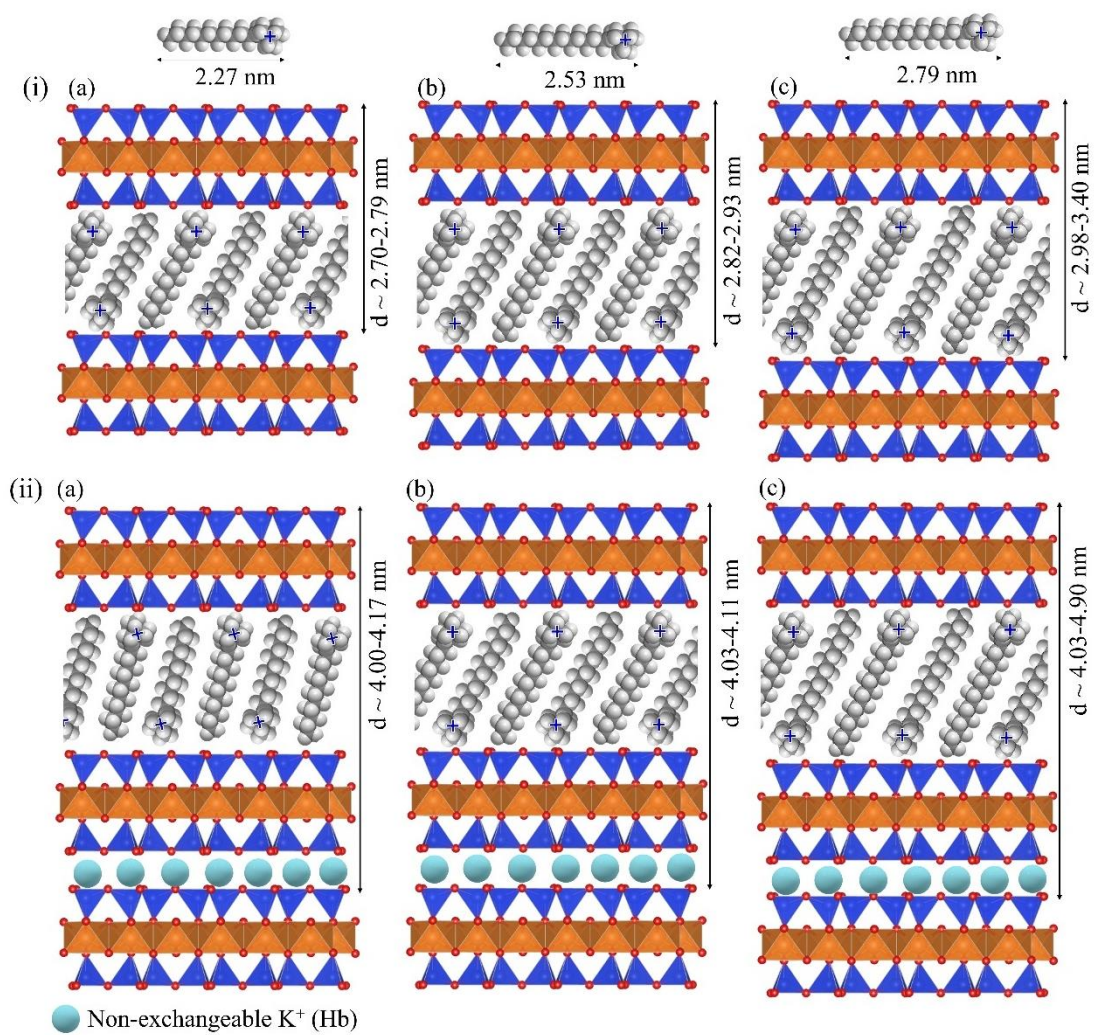

**Figure S2.** TEM images of (a) Na-Ver, (b) C<sub>14</sub>-Ver-100%, (c) C<sub>14</sub>-Ver-200%, (d) C<sub>16</sub>-Ver-100%, (e) C<sub>16</sub>-Ver-200%, (f) C<sub>18</sub>-Ver-100%, (g) C<sub>18</sub>-Ver-200%.

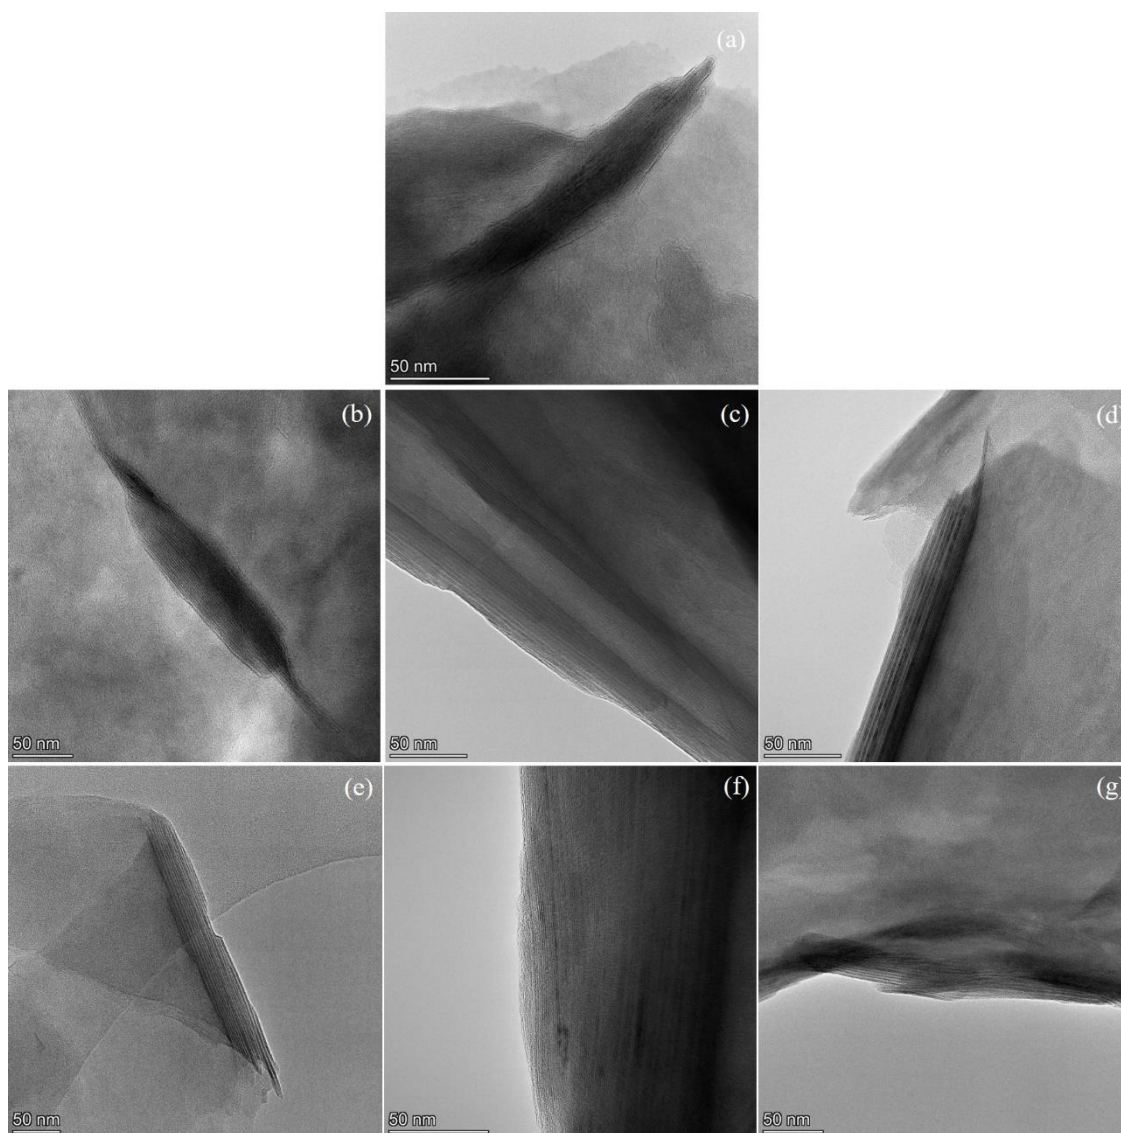



**Figure S3.** Nitrogen adsorption-desorption isotherms for (a) Na-Ver, (b) C<sub>14</sub>-Ver-100%, and (c) C<sub>16</sub>-Ver-100%, and (d) Kr adsorption isotherm for C<sub>18</sub>-Ver-100%.

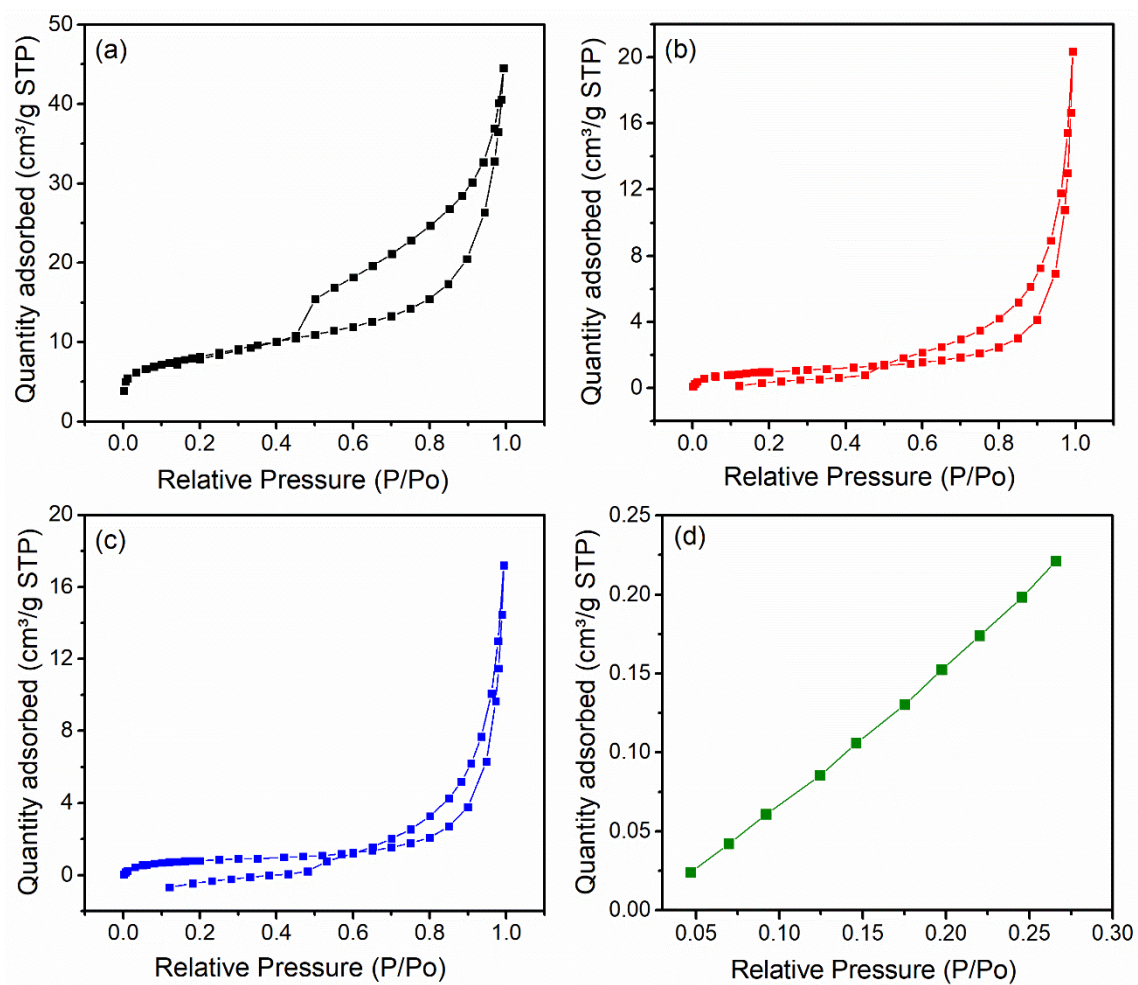

**Figure S4.** Graph of zeta potential versus amount of drug adsorbed by the organophilic vermiculites (25 °C, 25 mg mass adsorbent,  $C_i = 10 \text{ mg L}^{-1}$ , 24 h, pH 6.0 for  $C_{16}$ -Ver-200% and  $C_{18}$ -Ver-200%, and pH 8.0 for  $C_{14}$ -Ver-100%,  $C_{14}$ -Ver-200%,  $C_{16}$ -Ver-100%, and  $C_{18}$ -Ver-100%.

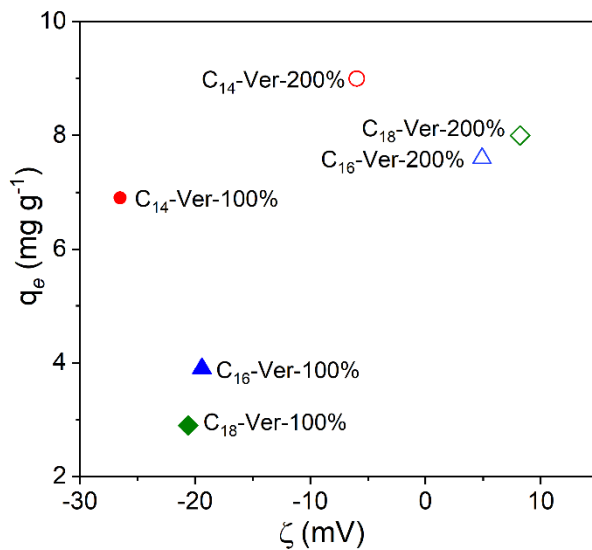

**Figure S5.** Relation between  $q_e$  and nitrogen content in the adsorbents (25 °C, pH 6.0 or 8.0 and  $C_i = 500 \text{ mg L}^{-1}$ ).

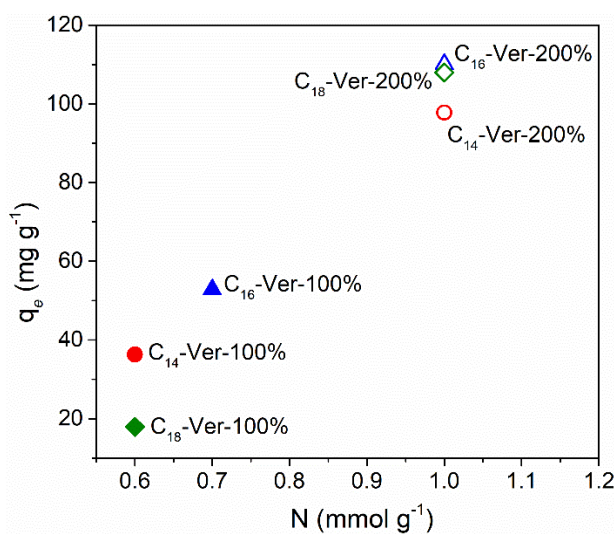

**Figure S6.** (i) TG and (ii) DTG curves for (a) C<sub>14</sub>-Ver-100%, (b) C<sub>16</sub>-Ver-100%, (c) C<sub>18</sub>-Ver-100%, (d) C<sub>14</sub>-Ver-200%, (e) C<sub>16</sub>-Ver-200% and (f) C<sub>18</sub>-Ver-200% after stability test at pH 6.0, and (iii) TG and (iv) DTG curves for (a) C<sub>14</sub>-Ver-100%, (b) C<sub>16</sub>-Ver-100%, (c) C<sub>18</sub>-Ver-100%, (d) C<sub>14</sub>-Ver-200%, (e) C<sub>16</sub>-Ver-200% and (f) C<sub>18</sub>-Ver-200% after stability test at pH 8.0.

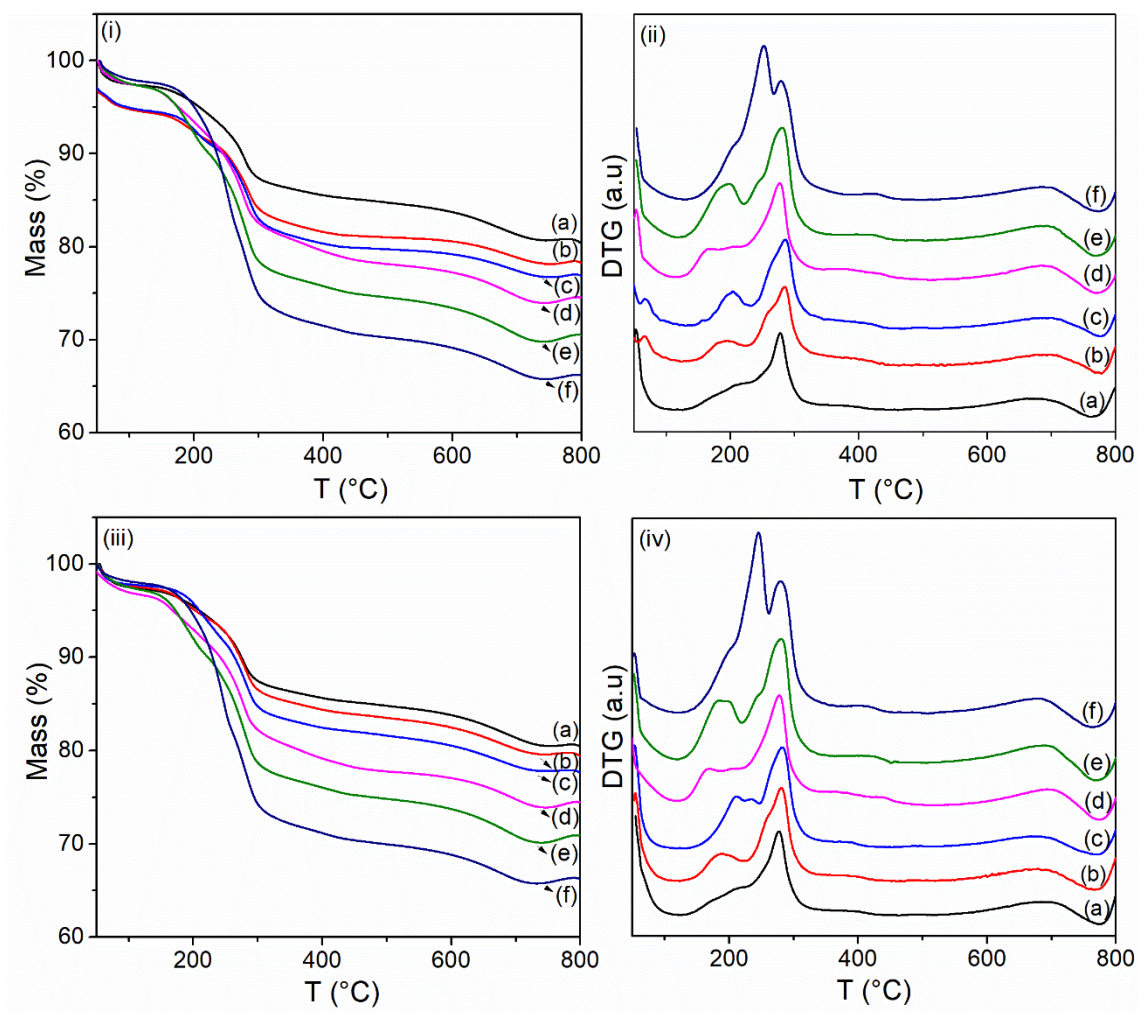

## References

- (1) Oliveira, T.; Guégan, R.; Thiebault, T.; Milbeau, C. Le; Muller, F.; Teixeira, V.; Giovanela, M.; Boussafir, M. Adsorption of Diclofenac onto Organoclays: Effects of Surfactant and Environmental (pH and Temperature) Conditions. *J. Hazard. Mater.* **2017**, *323*, 558–566, DOI: 10.1016/j.jhazmat.2016.05.001
- (2) França, D. B.; Trigueiro, P.; Silva Filho, E. C.; Fonseca, M. G.; Jaber, M. Monitoring Diclofenac Adsorption by Organophilic Alkylpyridinium Bentonites. *Chemosphere* **2020**, *242*, 125109, DOI: 10.1016/j.chemosphere.2019.125109
- (3) Chu, Y.; Dai, Y.; Xia, M.; Xing, X.; Wang, F.; Li, Y.; Gao, H. The Enhanced Adsorption of Diclofenac Sodium (DCF) and Ibuprofen (IBU) on Modified Montmorillonite with Benzyltrimethylhexadecylammonium Chloride (HDBAC). *Colloids Surf., A* **2024**, *681*, 132764, DOI: 10.1016/J.COLSURFA.2023.132764
- (4) Sun, K.; Shi, Y.; Chen, H.; Wang, X.; Li, Z. Extending Surfactant-Modified 2:1 Clay Minerals for the Uptake and Removal of Diclofenac from Water. *J. Hazard. Mater.* **2017**, *323*, 567–574, DOI: 10.1016/j.jhazmat.2016.05.038
- (5) Martinez-Costa, J. I.; Leyva-Ramos, R.; Padilla-Ortega, E. Sorption of Diclofenac from Aqueous Solution on an Organobentonite and Adsorption of Cadmium on Organobentonite Saturated with Diclofenac. *Clays Clay Miner.* **2018**, *66*, 515–528, DOI: 10.1346/ccmn.2018.064119
- (6) Iliescu, T.; Baia, M.; Kiefer, W. FT-Raman, Surface-Enhanced Raman Spectroscopy and Theoretical Investigations of Diclofenac Sodium. *Chem. Phys.* **2004**, *298*, 167–174, DOI: 10.1016/j.chemphys.2003.11.018
- (7) Lin-Vien, D.; Colthup, N. B.; Fateley, W. G.; Grasselli, J. G. *The Handbook of*

*Infrared and Raman Characteristic Frequencies of Organic Molecules*, 1st ed.;  
Academic Press: London, 1991.

- (8) Langmuir, I. The Adsorption of Gases on Plane Surfaces of Glass Mica and Platinum. *J. Am. Chem. Soc.* **1918**, *40*, 1361–1403, DOI: 10.1021/ja02242a004
- (9) Freundlich, H. M. F. Over the Adsorption in Solution. *J. Phys. Chem.* **1906**, *57*, 385–471, DOI: 10.1515/zpch-1907-5723
- (10) Temkin, M. J.; Pyzhev, V. Recent Modifications to Langmuir Isotherms. *Acta Physicochim. USSR* **1940**, *12*, 217–222.
